# Supplementary material for: Flow injection amperometric sensing of hydroxylamine at a Cu(ii)–neocuproine-functionalized multiwalled carbon nanotube/screen printed carbon electrode
Source: Royal Society of Chemistry journal article supplement (doi:10.1039/d1nj00824b), 2021-01-01
Supplement: d1nj00824b1.pdf [file d1nj00824b1.pdf]

## Supplementary File

### Flow injection amperometric sensing of hydroxylamine at Cu(II)-neocuproine functionalized multiwalled carbon nanotube/screen printed carbon electrode

Selen Ayaz<sup>1</sup>, Yusuf Dilgin<sup>1,\*</sup> and Reşat Apak<sup>2</sup>

<sup>1</sup>Department of Chemistry, Faculty of Science and Arts, Çanakkale Onsekiz Mart University 17100, Çanakkale, Turkey

<sup>2</sup>Department of Chemistry Faculty of Engineering, Istanbul University-Cerrahpasa, Avcılar, 34320 Istanbul, Turkey

E mail: ydilgin@yahoo.com and ydilgin@comu.edu.tr

## Contents

|                                                                                                                                                                                                                                                                                                                                                                                                                                                                                         |    |
|-----------------------------------------------------------------------------------------------------------------------------------------------------------------------------------------------------------------------------------------------------------------------------------------------------------------------------------------------------------------------------------------------------------------------------------------------------------------------------------------|----|
| <b>Fig. S1:</b> CVs of Cu(Ncp) <sub>2</sub> ] <sup>2+</sup> /Nf-MWCNT/SPCE in the BR buffer solutions with varying pH values at 50 mVs <sup>-1</sup> .....                                                                                                                                                                                                                                                                                                                              | 3  |
| <b>Fig. S2:</b> <b>A.</b> The FI amperometric i-t curves of Cu(Ncp) <sub>2</sub> ] <sup>2+</sup> /Nf-MWCNT/SPCE recorded by injection of 5.0×10 <sup>-5</sup> and 1.0×10 <sup>-4</sup> M NH <sub>2</sub> OH at various applied potentials (F <sub>r</sub> : 4.30 mLmin <sup>-1</sup> ; carrier steam: pH 10.0 BR buffer solution containing 0.10 M KCl; sample loop: 100 µL; tubing length: 10 cm) <b>B.</b> The plot of peak current of NH <sub>2</sub> OH vs. applied potential ..... | 4  |
| <b>Fig S3:</b> <b>A.</b> The FI amperometric i-t curves of Cu(Ncp) <sub>2</sub> ] <sup>2+</sup> /Nf-MWCNT/SPCE recorded by injection of 5.0×10 <sup>-5</sup> and 1.0×10 <sup>-4</sup> M NH <sub>2</sub> OH at various flow rates (E <sub>app</sub> : +0.30 V; carrier steam: pH 10.0 BR buffer solution containing 0.10 M KCl; sample loop: 100 µL; tubing length: 10 cm) <b>B.</b> The plot of peak current of NH <sub>2</sub> OH vs. flow rate .....                                  | 5  |
| <b>Fig. S4:</b> <b>A.</b> FI amperometric i-t curves of NH <sub>2</sub> OH in the range from 5.0 to 1000.0 µM at bare SPCE under optimized conditions (E <sub>app</sub> : +0.30 V; F <sub>r</sub> : 4.30 mL min <sup>-1</sup> carrier steam: pH 10.0 BR buffer solution containing 1.0 M KCl; sample loop: 100 µL; tubing length: 10 cm). <b>B.</b> Calibration curve of NH <sub>2</sub> OH obtained from bare SPCE .....                                                               | 6  |
| <b>Fig. S5:</b> <b>A.</b> FI amperometric i-t curves of NH <sub>2</sub> OH in the range from 5.0 to 1000.0 µM at MWCNT/SPCE under optimized conditions given in Fig. S5A. <b>B.</b> Calibration curve of NH <sub>2</sub> OH obtained from MWCNT/SPCE .....                                                                                                                                                                                                                              | 7  |
| <b>Fig. S6:</b> <b>A.</b> FI amperometric i-t curves of NH <sub>2</sub> OH in the range from 5.0 to 1000.0 µM at Nf-MWCNT/SPCE under optimized conditions given in Fig. S5A. <b>B.</b> Calibration curve of NH <sub>2</sub> OH obtained from Nf-MWCNT/SPCE .....                                                                                                                                                                                                                        | 8  |
| <b>Fig. S7:</b> FI amperometric i-t curves of 5.0×10 <sup>-5</sup> mol L <sup>-1</sup> NH <sub>2</sub> OH by 50 sequential injections at Cu(Ncp) <sub>2</sub> ] <sup>2+</sup> /Nf-MWCNT/SPCE under optimized conditions given in Fig. S5A .....                                                                                                                                                                                                                                         | 9  |
| <b>Fig. S8:</b> <b>A.</b> FI amperometric i-t curves of interference effect of some cations on NH <sub>2</sub> OH determination at [Cu(Ncp) <sub>2</sub> ] <sup>2+</sup> /Nf-MWCNT/SPCE under optimized conditions given in Fig. S5A. <b>B.</b> The percentage error of some cations on NH <sub>2</sub> OH determination .....                                                                                                                                                          | 10 |

**Fig. S9:** **A.** FI amperometric i-t curves of interference effect of some anions on NH<sub>2</sub>OH determination at [Cu(Ncp)<sub>2</sub>]<sup>2+</sup>/Nf-MWCNT/SPCE under optimized conditions given in Fig. S5A. **B.** The percentage error of some anions on NH<sub>2</sub>OH determination ..... 11

**Fig. S10:** **A.** FI amperometric i-t curves of interference effect of some organic molecules on NH<sub>2</sub>OH determination at [Cu(Ncp)<sub>2</sub>]<sup>2+</sup>/Nf-MWCNT/SPCE under optimized conditions given in Fig. S5A. **B.** The percentage error of some organic molecules on NH<sub>2</sub>OH determination. 12

**Fig. S11.** FI amperometric i-t curves obtained from determination of hydroxyurea in Hydrea capsule by standard addition method under optimized conditions given in Fig. S5A. (a: Diluted hydroxyurea solution explained in experimental section; b) a + 5.0; c) a + 10.0; d) a + 15.0; e) a + 25.0; and f) a + 30.0 μM NH<sub>2</sub>OH). **B.** Obtained standard addition curve ..... 13

Fig. S1

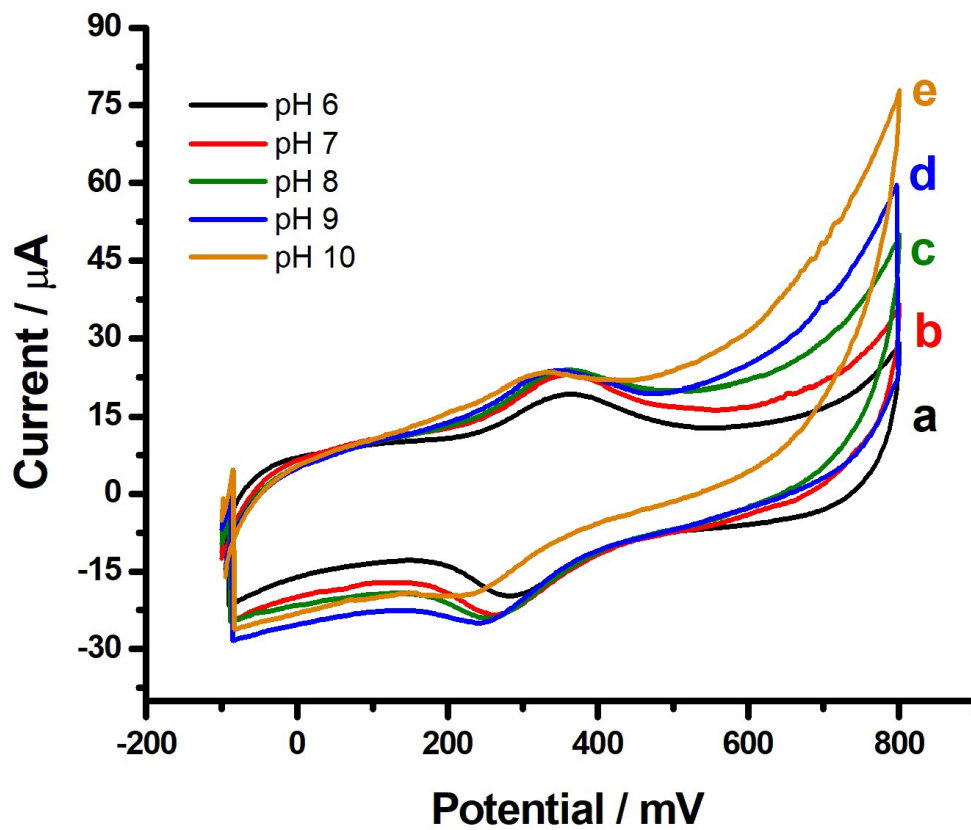

CVs of Cu(Ncp)<sub>2</sub>]<sup>2+</sup>/Nf-MWCNT/SPCE in the BR buffer solutions with varying pH values at 50 mV s<sup>-1</sup>.

Fig. S2

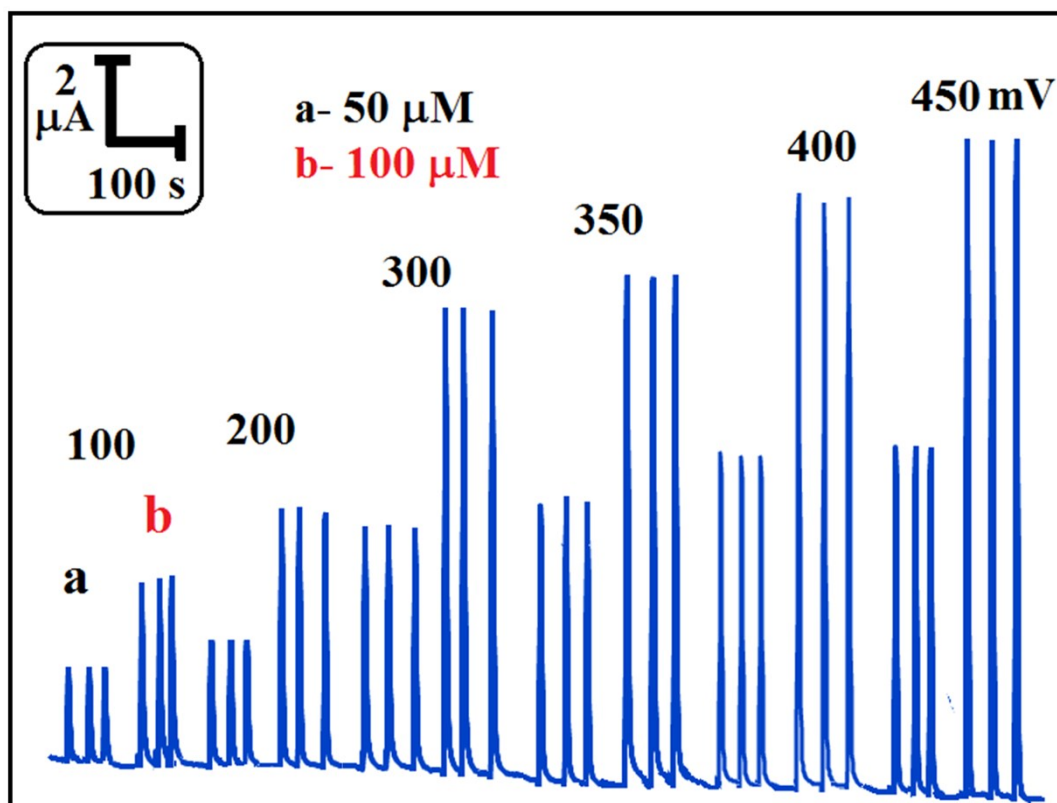

A. The FI amperometric *i-t* curves of  $\text{Cu}(\text{Ncp})_2]^{2+}/\text{Nf-MWCNT}/\text{SPCE}$  recorded by injection of  $5.0 \times 10^{-5}$  and  $1.0 \times 10^{-4} \text{ M}$   $\text{NH}_2\text{OH}$  at various applied potentials ( $F_r$ :  $4.30 \text{ mLmin}^{-1}$ ; carrier steam: pH 10.0 BR buffer solution containing 0.10 M KCl; sample loop:  $100 \mu\text{L}$ ; tubing length: 10 cm)

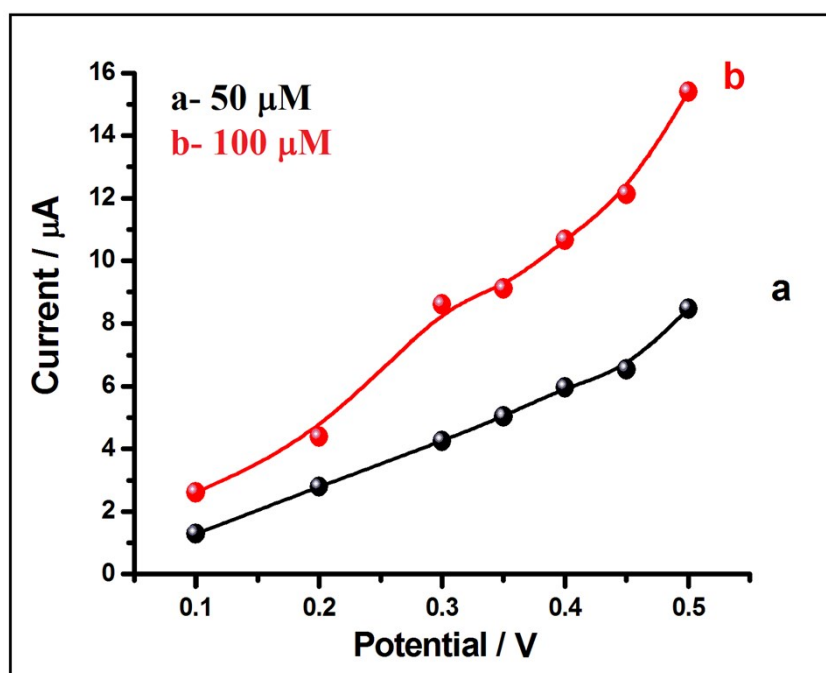

B) The plot of peak current of  $\text{NH}_2\text{OH}$  vs. applied potential

Fig. S3

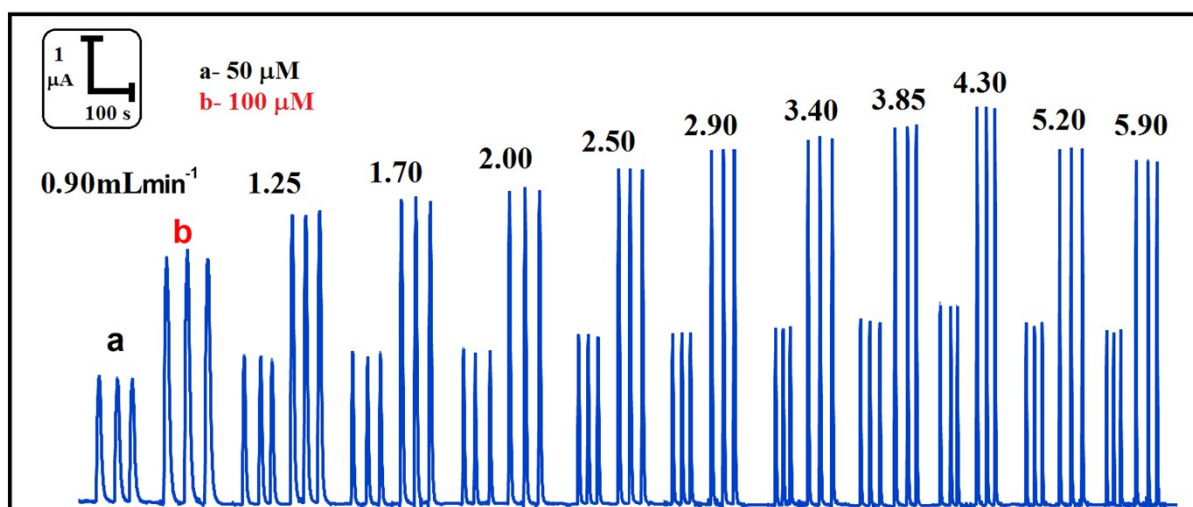

A. The FI amperometric i-t curves of  $\text{Cu}(\text{Ncp})_2]^{2+}/\text{Nf-MWCNT}/\text{SPCE}$  recorded by injection of  $5.0 \times 10^{-5}$  and  $1.0 \times 10^{-4}$  M  $\text{NH}_2\text{OH}$  at various flow rates ( $E_{\text{app}}$ : +0.30 V; carrier stream: pH 10.0 BR buffer solution containing 0.10 M KCl; sample loop: 100  $\mu\text{L}$ ; tubing length: 10 cm)

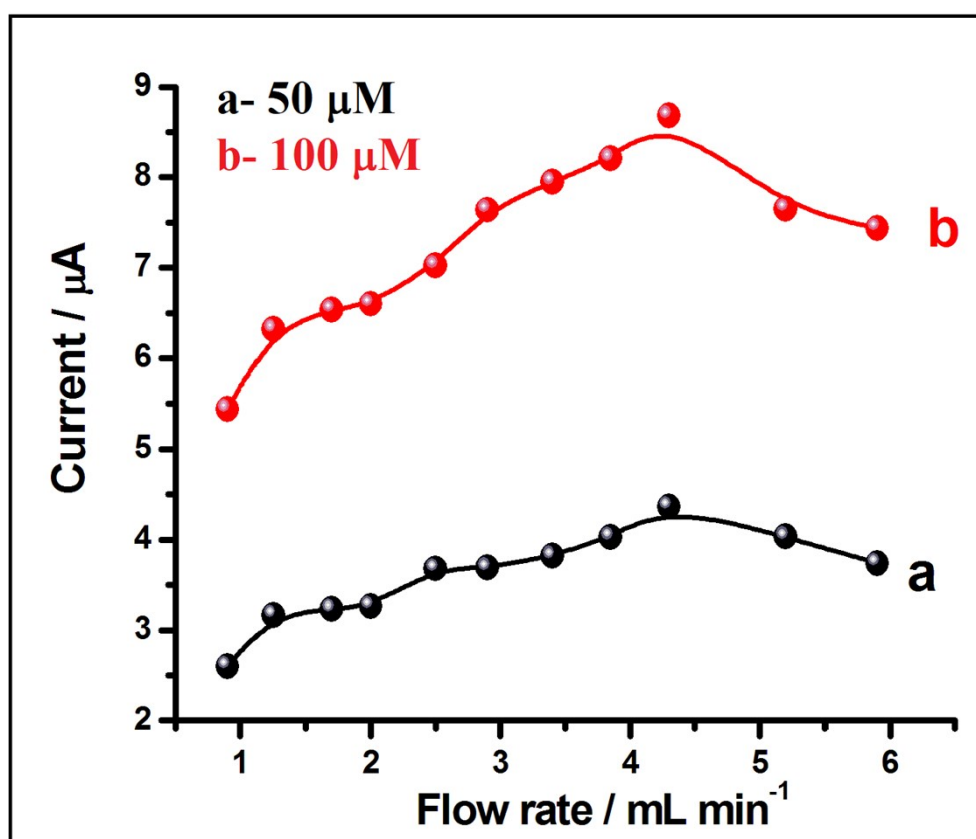

B. The plot of peak current of  $\text{NH}_2\text{OH}$  vs. flow rate

Fig. S4

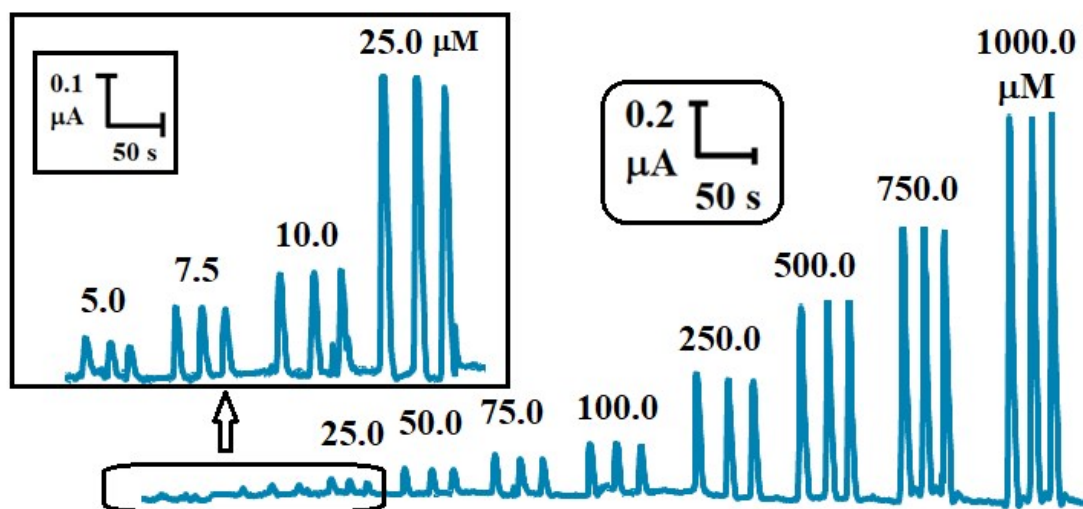

A. FI amperometric i-t curves of NH<sub>2</sub>OH in the range from 5.0 to 1000.0 μM at bare SPCE under optimized conditions ( $E_{app}$ : +0.30 V;  $F_r$ : 4.30 mL min<sup>-1</sup> carrier steam: pH 10.0 BR buffer solution containing 1.0 M KCl; sample loop: 100 μL; tubing length: 10 cm).

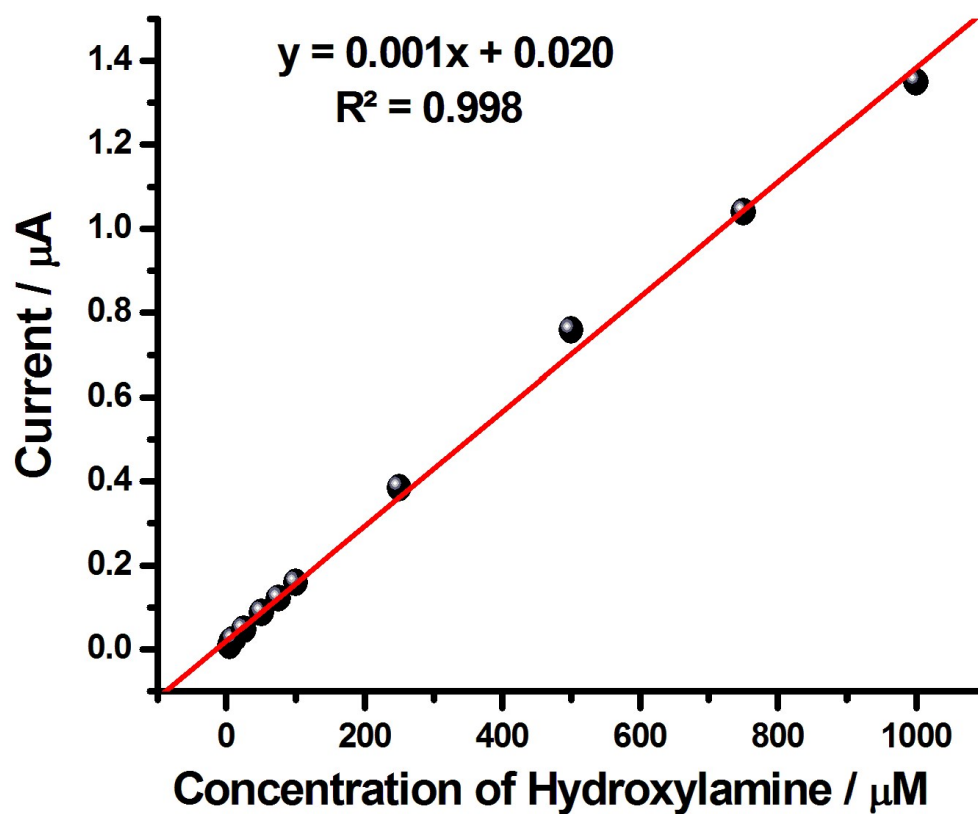

B. Calibration curve of NH<sub>2</sub>OH obtained from bare SPCE.

Fig. S5

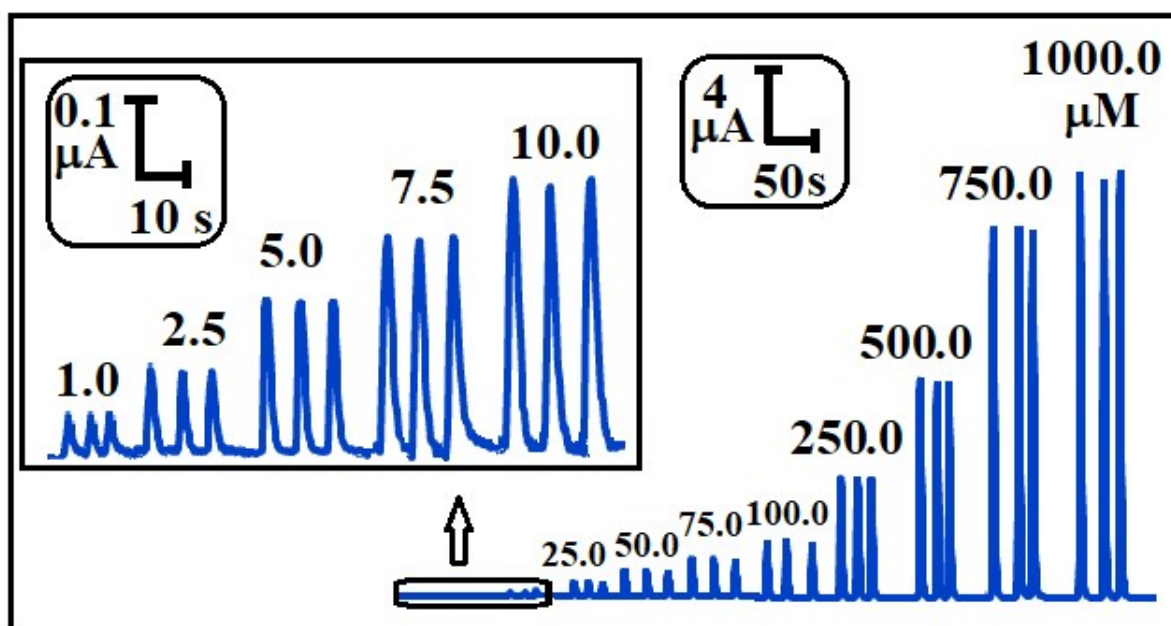

A. FI amperometric i-t curves of NH<sub>2</sub>OH in the range from 5.0 to 1000.0 μM at MWCNT/SPCE under optimized conditions given in Fig. S5A.

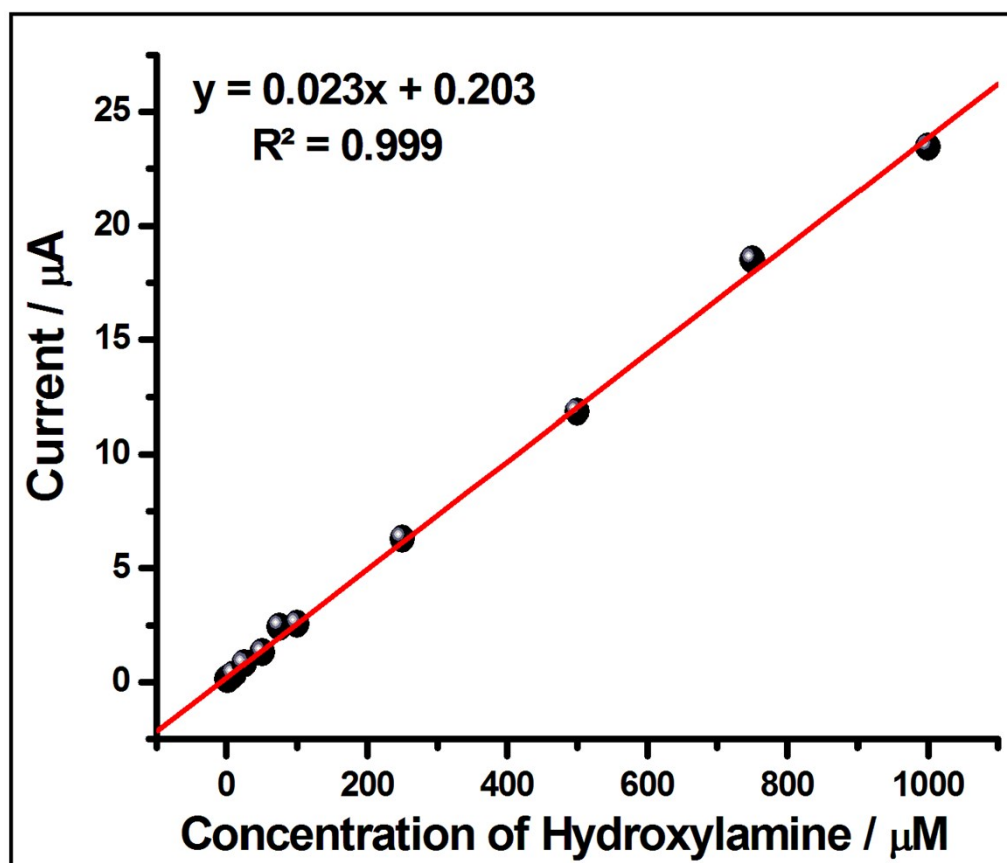

B. Calibration curve of  $\text{NH}_2\text{OH}$  obtained from MWCNT/SPCE.

Fig. S6

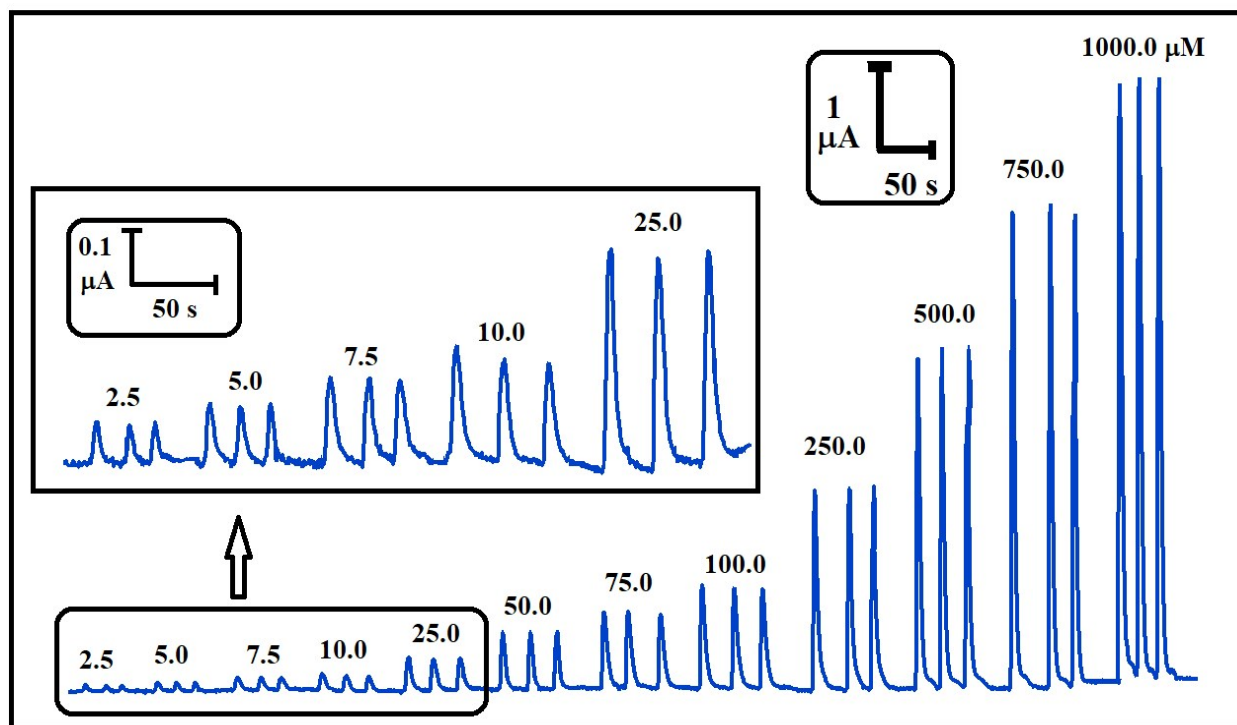

A. FI amperometric *i-t* curves of  $\text{NH}_2\text{OH}$  in the range from 5.0 to 1000.0  $\mu\text{M}$  at Nf-MWCNT/SPCE under optimized conditions given in Fig. S5A.

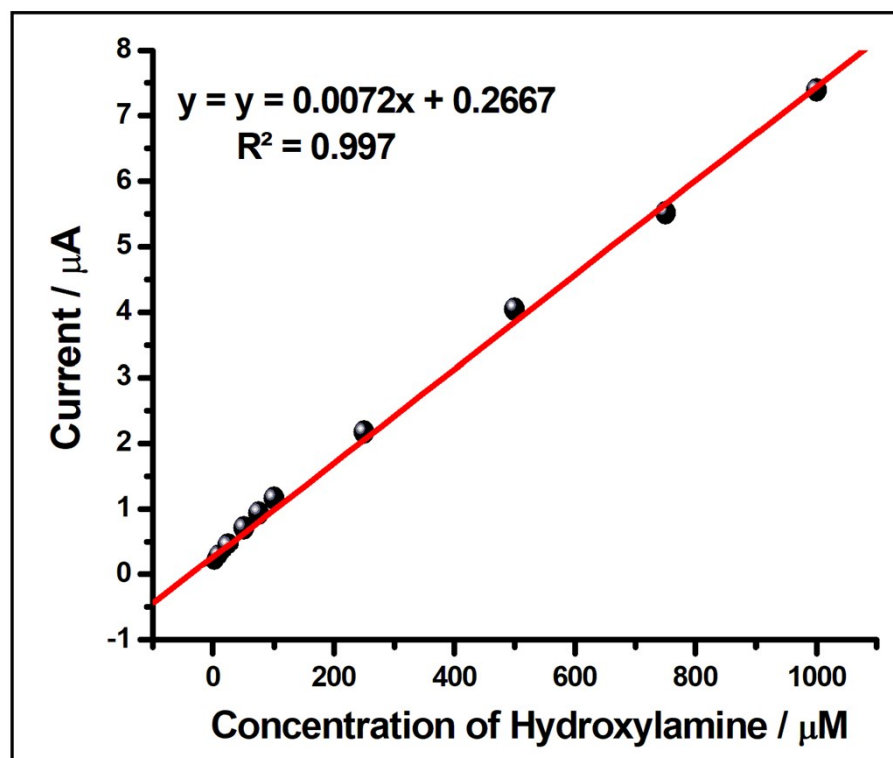



B. Calibration curve of  $\text{NH}_2\text{OH}$  obtained from Nf-MWCNT/SPCE.

Fig. S7

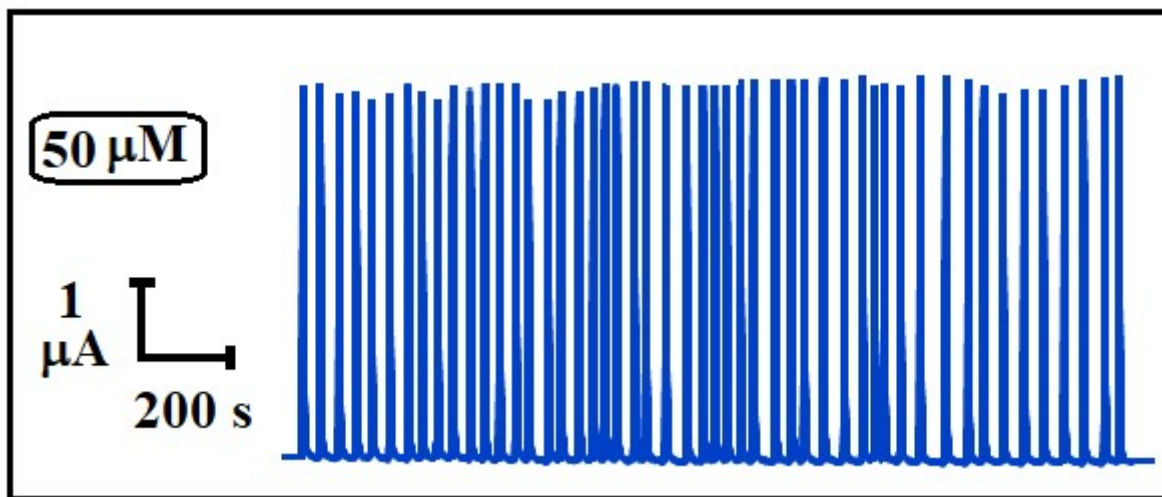

FI amperometric *i-t* curves of  $5.0 \times 10^{-5} \text{ mol L}^{-1} \text{ NH}_2\text{OH}$  by 50 sequential injections at  $\text{Cu}(\text{Ncp})_2]^{2+}/\text{Nf-MWCNT/SPCE}$  under optimized conditions given in Fig. S5A.

Fig. S8

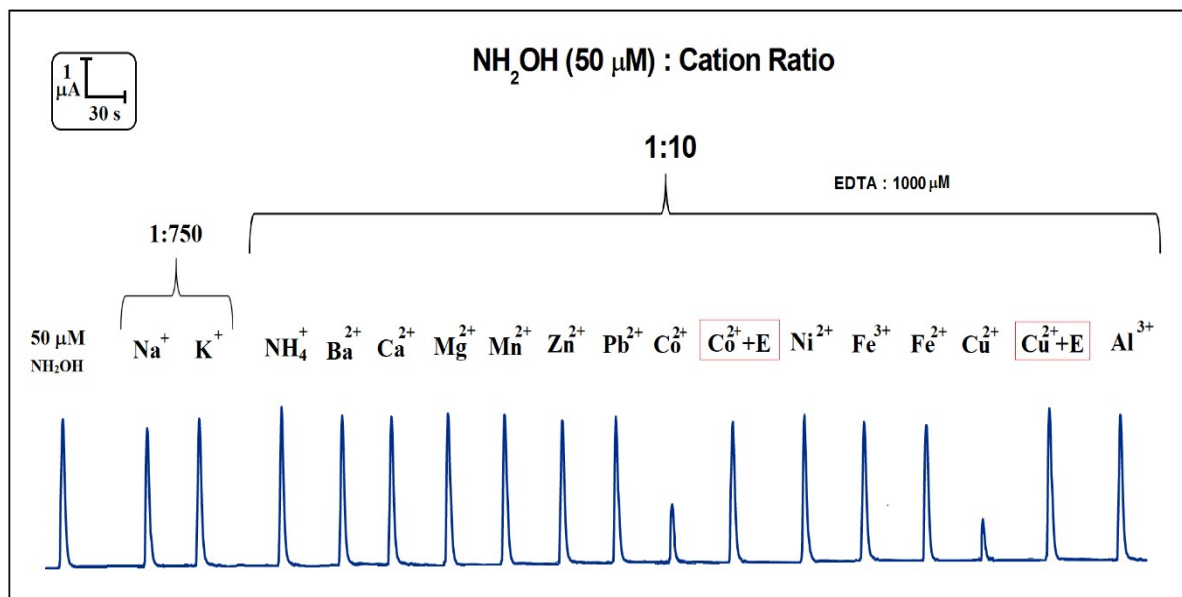

A. FI amperometric *i-t* curves of interference effect of some cations on  $\text{NH}_2\text{OH}$  determination at  $[\text{Cu}(\text{Ncp})_2]^{2+}/\text{Nf-MWCNT}/\text{SPCE}$  under optimized conditions given in Fig. S5A.

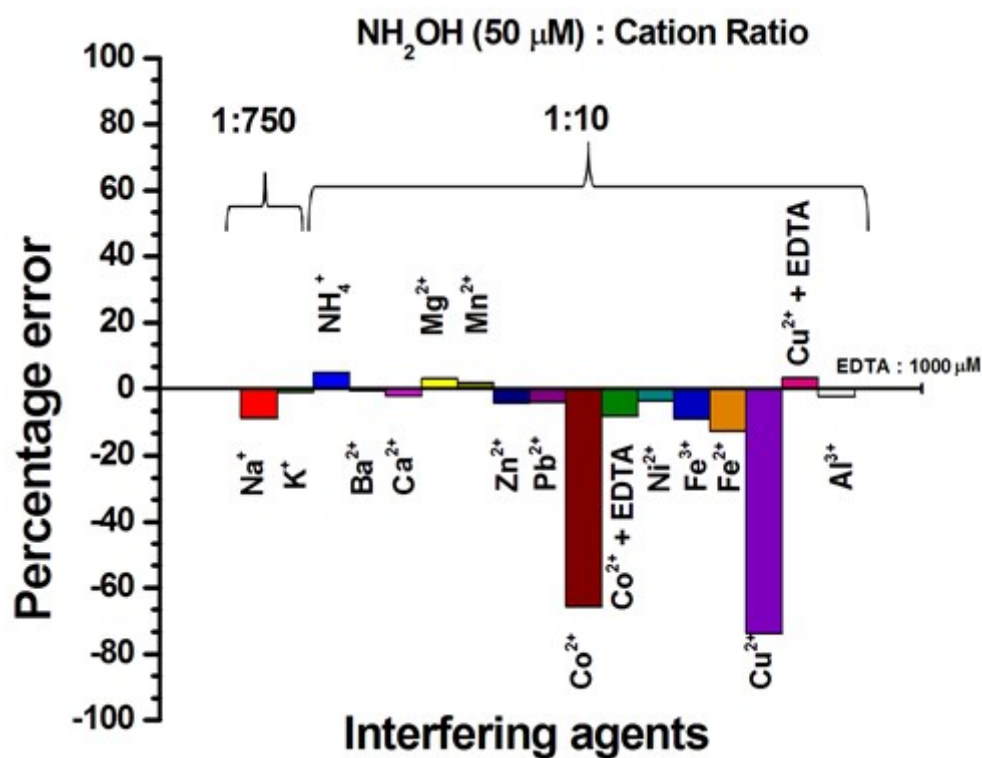

B. The percentage error of some cations on  $\text{NH}_2\text{OH}$  determination

Fig. S9

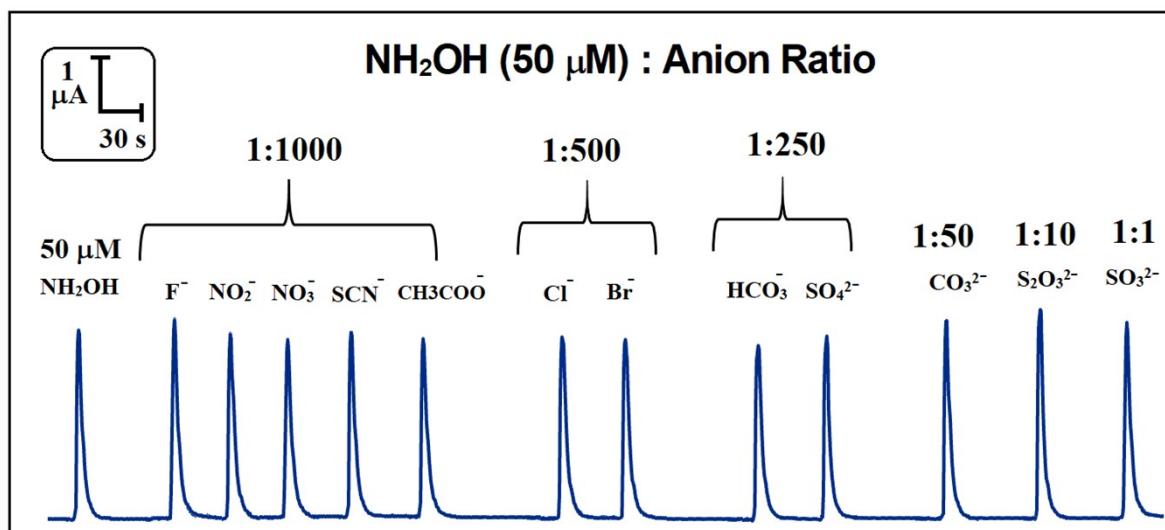

A. FI amperometric *i-t* curves of interference effect of some anions on  $\text{NH}_2\text{OH}$  determination at  $[\text{Cu}(\text{Ncp})_2]^{2+}/\text{Nf-MWCNT}/\text{SPCE}$  under optimized conditions given in Fig. S5A.

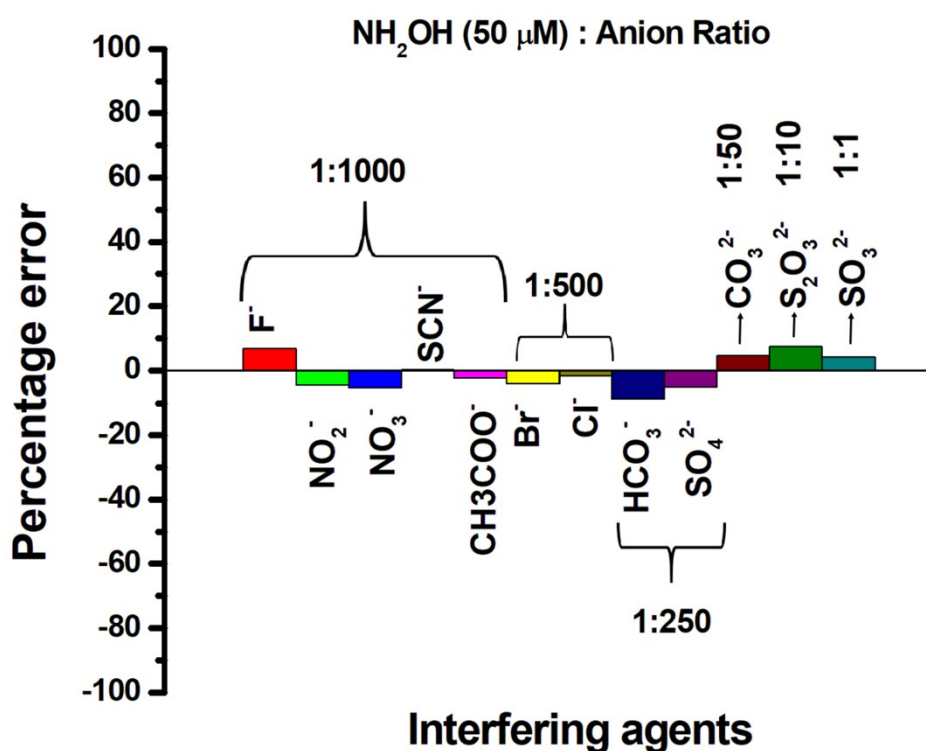

B. The percentage error of some anions on  $\text{NH}_2\text{OH}$  determination

Fig. S10

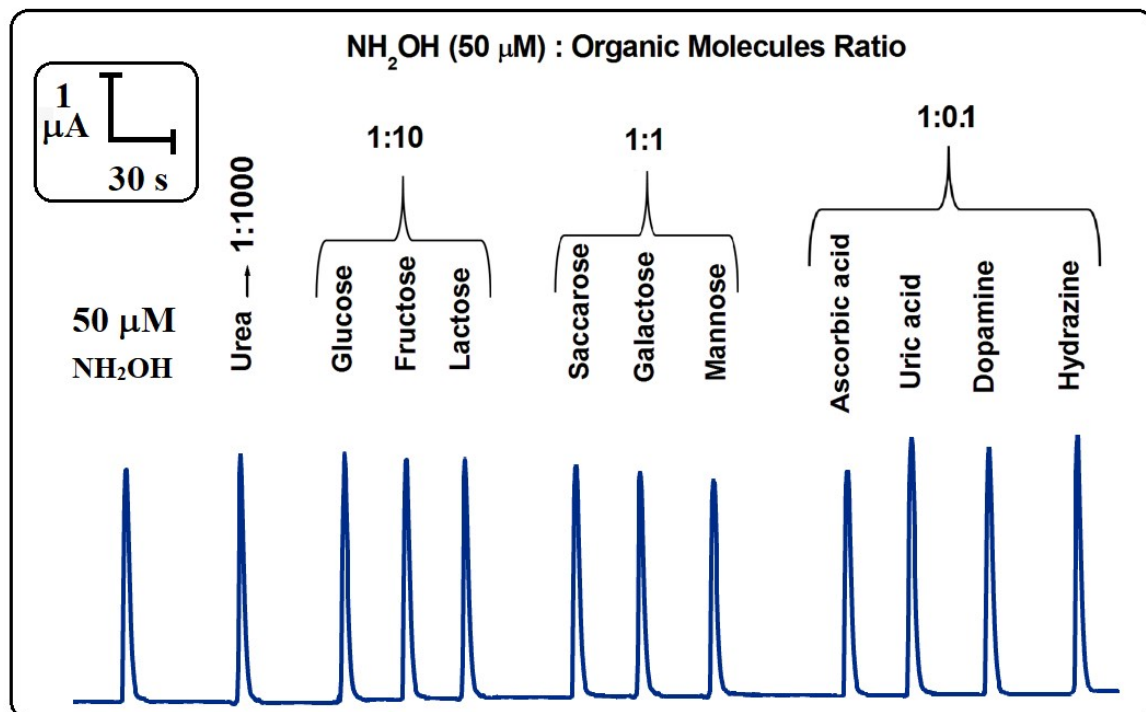

- A. FI amperometric *i-t* curves of interference effect of some organic molecules on NH<sub>2</sub>OH determination at [Cu(Ncp)<sub>2</sub>]<sup>2+</sup>/Nf-MWCNT/SPCE under optimized conditions given in Fig. S5A.

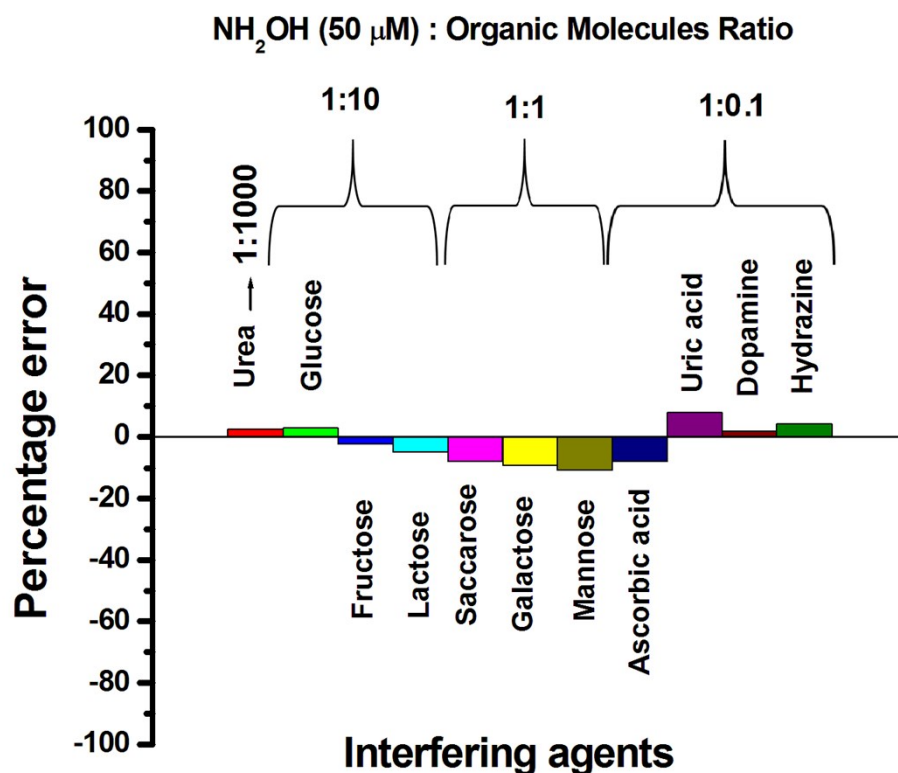

B. The percentage error of some organic molecules on NH<sub>2</sub>OH determination

Fig. S11

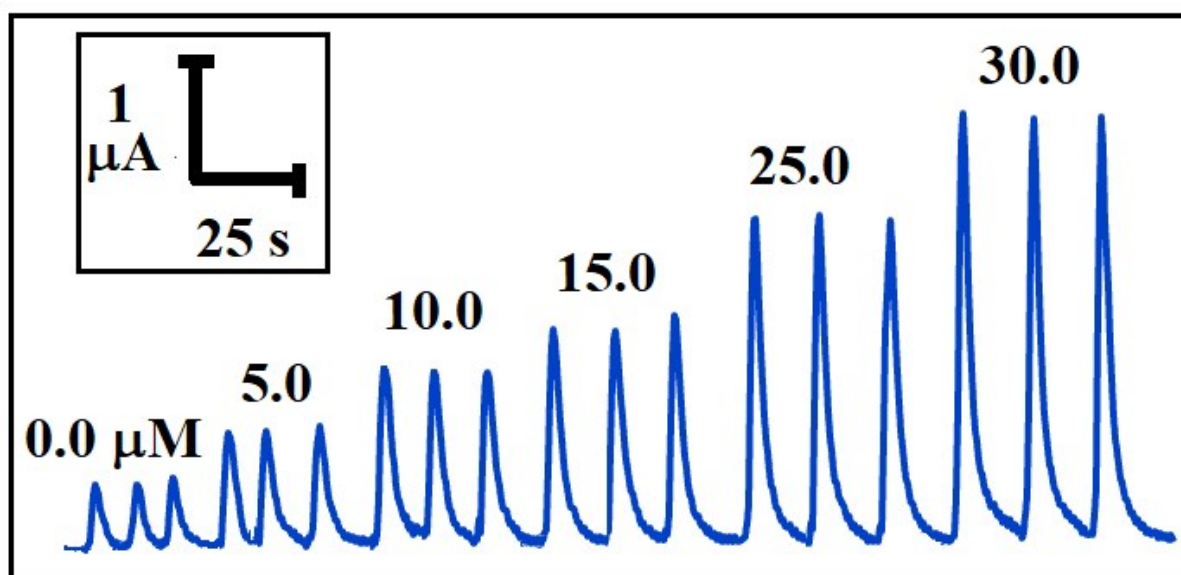

A. FI amperometric *i-t* curves obtained from determination of hydroxyurea in Hydrea capsule by standard addition method under optimized conditions given in Fig. S5A. (a: Diluted hydroxyurea solution explained in experimental section; b) a + 5.0; c) a + 10.0; d) a + 15.0; e) a + 25.0; and f) a + 30.0 μM NH<sub>2</sub>OH)

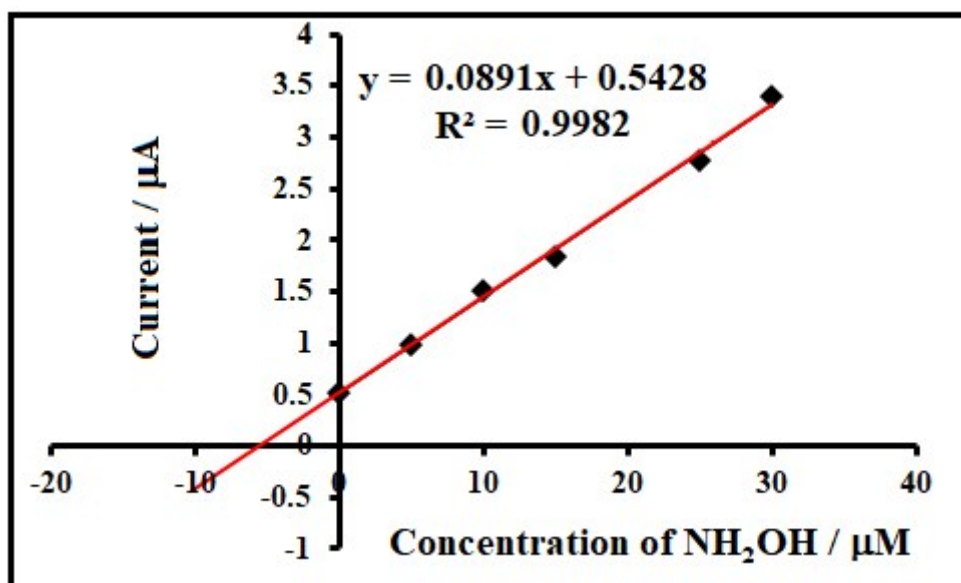

B. Obtained standard addition curve.
